# Supplementary material for: Effects of Fu brick tea polysaccharides on gut microbiota and fecal metabolites of HFD/STZ-induced type 2 diabetes rats
Source: Royal Society of Chemistry journal article supplement (doi:10.1039/d3fo04215d), 2023-01-01
Supplement: d3fo04215d1.pdf [file d3fo04215d1.pdf]

## **Effects of Fu Brick Tea Polysaccharides on Gut Microbiota and Fecal Metabolites of HFD/STZ-Induced Type 2 Diabetes Rats**

Xiangnan Zhang<sup>a</sup>, Qiannan Li<sup>a</sup>, Ning Han<sup>b</sup>, Chaofan Song<sup>b</sup>, Yangnan Lin<sup>a</sup>, Liansheng Zhang<sup>b</sup>,  
Daoyuan Ren<sup>a</sup>, Yan Zhao<sup>b</sup>, Xingbin Yang<sup>a,\*</sup>, Ting Li<sup>a,\*</sup>

<sup>a</sup> *Shaanxi Engineering Laboratory for Food Green Processing and Safety Control, and Shaanxi  
Key Laboratory for Hazard Factors Assessment in Processing and Storage of Agricultural  
Products, College of Food Engineering and Nutritional Science, Shaanxi Normal University,  
Xi'an 710119, China*

<sup>b</sup> *Division Food and Nutrition Science, Department of Biology and Biological Engineering,  
Chalmers University of Technology, Gothenburg, SE-412 96 Sweden*

<sup>c</sup> *Key Laboratory of Ministry of Education for Medicinal Resource and Natural Pharmaceutical  
Chemistry, College of Life Sciences, Shaanxi Normal University, Xi'an 710119, China*

### Correlation Heatmap

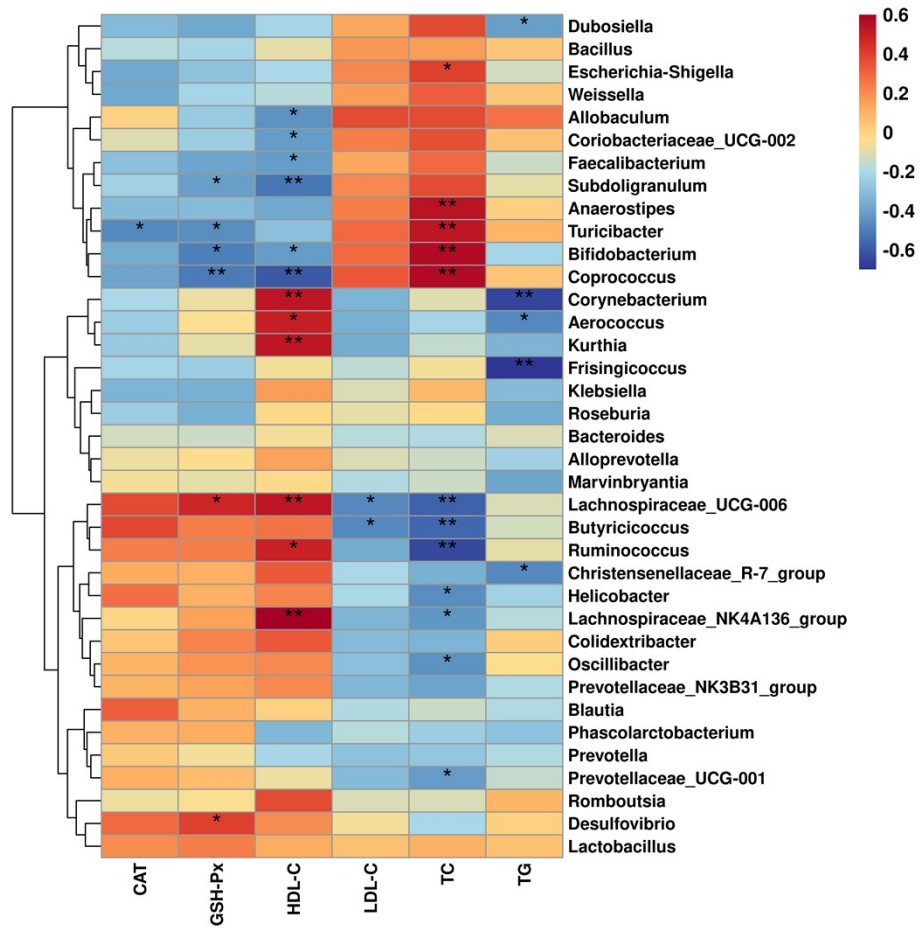

**Figure S1** Spearman's correlation between gut microbiota at genus level and biochemical parameters. Colors of squares represent R-value of Spearman's correlation.  $p < 0.05$ \* and  $p < 0.01$ \*\* indicate the association significant, respectively.

**Table S1 The basic raw data, including information on weight, blood glucose parameters, kits used, and more, is available for reference.**

| Body weight (g)    |          |          |            |          |                       |          |              |          |              |          |
|--------------------|----------|----------|------------|----------|-----------------------|----------|--------------|----------|--------------|----------|
|                    | NC group |          | T2DM group |          | Met group             |          | FBTP-L group |          | FBTP-H group |          |
| Time               | Mean     | SD       | Mean       | SD       | Mean                  | SD       | Mean         | SD       | Mean         | SD       |
| 0 Week             | 469.25   | 16.62829 | 455.625    | 22.28989 | 466.875               | 22.1194  | 467.75       | 48.01413 | 442.125      | 42.21861 |
| 1 Week             | 492.125  | 29.40086 | 388.125    | 73.30842 | 430.5                 | 27.30254 | 414.5        | 95.01579 | 436.875      | 57.23994 |
| 2 Week             | 510.875  | 25.08521 | 411.5      | 62.02995 | 429.375               | 16.34396 | 438.5        | 48.35287 | 440.75       | 88.85904 |
| 3 Week             | 531.375  | 28.73991 | 428.75     | 55.03181 | 426.125               | 49.31368 | 435.5        | 100.1071 | 449.25       | 49.89632 |
| 4 Week             | 533.625  | 27.81026 | 421        | 65.34305 | 431                   | 51.72455 | 442.75       | 65.05767 | 445.625      | 89.70418 |
| 5 Week             | 545.125  | 27.4249  | 415.375    | 37.28246 | 433.375               | 29.6163  | 446.375      | 57.73075 | 445.125      | 53.11292 |
| 6 Week             | 555.375  | 33.60246 | 416.875    | 22.40815 | 435.75                | 61.2833  | 451.875      | 71.2028  | 458.25       | 75.20591 |
| 7 Week             | 561.125  | 30.55411 | 405.875    | 45.36341 | 439.125               | 34.82379 | 451.25       | 57.98214 | 456          | 69.67475 |
| 8 Week             | 580.5    | 26.6351  | 374.75     | 43.30539 | 442                   | 54.41113 | 454.75       | 62.40822 | 463.625      | 63.88145 |
| Kidney weight (g)  |          |          |            |          | Liver weight (g)      |          |              |          |              |          |
| NC                 | T2DM     | Met      | FBTP-L     | FBTP-H   | NC                    | T2DM     | Met          | FBTP-L   | FBTP-H       |          |
| 1.736              | 2.2534   | 1.983    | 1.7886     | 2.0599   | 18.0238               | 23.3817  | 23.2996      | 13.5272  | 19.946       |          |
| 1.8717             | 2.0164   | 2.0141   | 1.5429     | 1.8231   | 17.0474               | 28.5654  | 19.8491      | 21.47    | 15.7533      |          |
| 1.6728             | 2.2598   | 2.1649   | 1.7816     | 1.9399   | 20.5838               | 34.3432  | 15.9999      | 14.1116  | 12.9308      |          |
| 1.954              | 2.2413   | 1.6856   | 1.87       | 1.9589   | 23.6594               | 27.7296  | 16.6685      | 11.8     | 14.8542      |          |
| 1.6381             | 2.1434   | 1.9025   | 1.58       | 1.8038   | 18.6745               | 25.4964  | 11.6334      | 15.5309  | 16.3574      |          |
| 1.9004             | 2.3233   | 2.3028   | 2.079      | 2.0137   | 16.8875               | 26.0257  | 17.1333      | 16.0813  | 15.8244      |          |
| 1.7065             | 2.2728   | 1.9261   | 1.9524     | 1.8534   | 17.2658               | 25.6254  | 18.6354      | 14.3625  | 12.3624      |          |
| 1.6584             | 2.0254   | 1.9657   | 1.8546     | 1.8263   | 18.2654               | 26.3254  | 18.6524      | 15.2658  | 13.2655      |          |
| HI% (Haptic index) |          |          |            |          | Insulin levels (mU/L) |          |              |          |              |          |
| NC                 | T2DM     | Met      | FBTP-L     | FBTP-H   | NC                    | T2DM     | Met          | FBTP-L   | FBTP-H       |          |
| 3.173204           | 7.542484 | 5.06513  | 3.213112   | 3.9892   | 39.47072              | 41.27252 | 44.20045     | 29.78604 | 32.48874     |          |

|                                           |                 |           |                   |           |                  |           |                     |           |                     |           |
|-------------------------------------------|-----------------|-----------|-------------------|-----------|------------------|-----------|---------------------|-----------|---------------------|-----------|
| 3.110839                                  | 7.231747        | 4.009919  | 5.505128          | 4.049692  |                  | 46.79054  | 43.63739            | 44.87613  | 29.33559            | 28.43468  |
| 3.688853                                  | 8.805949        | 3.245416  | 2.627858          | 3.33268   |                  | 46.11486  | 42.73649            | 40.25901  | 33.38964            | 29.33559  |
| 3.773429                                  | 6.602286        | 3.387907  | 2.935323          | 3.243275  |                  | 42.8491   | 43.63739            | 40.82207  | 31.81306            | 25.39414  |
| 3.197688                                  | 7.893622        | 3.178525  | 3.339978          | 3.304525  |                  | 36.43018  | 42.39865            | 41.38514  | 29.78604            | 29.33559  |
| 2.988938                                  | 6.080771        | 3.902802  | 2.918566          | 2.997045  |                  | 37.66892  | 48.36712            | 40.59685  | 28.99775            | 27.75901  |
| 2.835107                                  | 7.342521        | 4.333814  | 3.572761          | 2.255912  |                  | 36.654    | 48.6254             | 40.321    | 28.3654             | 25.654    |
| <b>OGTT (Oral Glucose Tolerance Test)</b> |                 |           |                   |           |                  |           |                     |           |                     |           |
|                                           | <b>NC group</b> |           | <b>T2DM group</b> |           | <b>Met group</b> |           | <b>FBTP-L group</b> |           | <b>FBTP-H group</b> |           |
| <b>Time</b>                               | <b>Mean</b>     | <b>SD</b> | <b>Mean</b>       | <b>SD</b> | <b>Mean</b>      | <b>SD</b> | <b>Mean</b>         | <b>SD</b> | <b>Mean</b>         | <b>SD</b> |
| 0 min                                     | 4.77            | 0.402906  | 17.3125           | 1.946012  | 12.925           | 5.259481  | 11.2125             | 4.547036  | 9.5125              | 3.474987  |
| 30 min                                    | 7.89            | 1.19485   | 28.1625           | 2.753666  | 23.2625          | 5.315459  | 19.575              | 6.242424  | 20.825              | 4.018795  |
| 60 min                                    | 7.09            | 1.018114  | 23.9125           | 1.82243   | 22.65            | 3.348347  | 18.275              | 7.161554  | 18.2625             | 4.981376  |
| 90 min                                    | 6.01            | 0.652261  | 21.1625           | 1.773566  | 21.6125          | 2.449745  | 17.25               | 7.264788  | 17.25               | 7.264788  |
| 120 min                                   | 5.82            | 0.482586  | 19.55             | 1.474546  | 18.85            | 3.464514  | 16.2625             | 7.086796  | 15.7625             | 6.306445  |
| <b>ITT (Insulin Tolerance Test)</b>       |                 |           |                   |           |                  |           |                     |           |                     |           |
|                                           | <b>NC group</b> |           | <b>T2DM group</b> |           | <b>Met group</b> |           | <b>FBTP-L group</b> |           | <b>FBTP-H group</b> |           |
| <b>Time</b>                               | <b>Mean</b>     | <b>SD</b> | <b>Mean</b>       | <b>SD</b> | <b>Mean</b>      | <b>SD</b> | <b>Mean</b>         | <b>SD</b> | <b>Mean</b>         | <b>SD</b> |
| 0 min                                     | 4.9             | 0.359011  | 18.1875           | 1.631334  | 16.45            | 4.292851  | 14.975              | 2.147257  | 13.325              | 2.4662    |
| 30 min                                    | 4.37            | 0.845971  | 15.3              | 3.069667  | 14.15            | 4.050749  | 13.825              | 3.456567  | 12.5625             | 3.089585  |
| 60 min                                    | 3.93            | 1.284999  | 10.0125           | 4.829208  | 10.825           | 2.260689  | 9.5625              | 4.679725  | 6.575               | 2.206322  |
| 90 min                                    | 3.23            | 0.894489  | 10.0625           | 4.037304  | 9.925            | 2.22245   | 7.3875              | 3.330138  | 4.025               | 1.372953  |
| 120 min                                   | 3.78            | 0.995322  | 8.25              | 1.667333  | 9.2875           | 3.515044  | 6.15                | 2.675818  | 4.9                 | 1.320173  |
| <b>Fasting blood glucose (mmol/L)</b>     |                 |           |                   |           |                  |           |                     |           |                     |           |
|                                           | <b>NC group</b> |           | <b>T2DM group</b> |           | <b>Met group</b> |           | <b>FBTP-L group</b> |           | <b>FBTP-H group</b> |           |
| <b>Time</b>                               | <b>Mean</b>     | <b>SD</b> | <b>Mean</b>       | <b>SD</b> | <b>Mean</b>      | <b>SD</b> | <b>Mean</b>         | <b>SD</b> | <b>Mean</b>         | <b>SD</b> |
| 0 Week                                    | 5.31            | 0.401123  | 21.7875           | 1.660149  | 18.075           | 2.874783  | 19.6625             | 2.874864  | 19.1375             | 2.595639  |
| 1 Week                                    | 4.95            | 0.366742  | 20.025            | 2.483319  | 17.8375          | 3.019494  | 13.9625             | 2.1065    | 13.7                | 2.245551  |
| 2 Week                                    | 5.04            | 0.549909  | 16.675            | 1.070922  | 16.0375          | 1.255923  | 13.775              | 1.29301   | 13.1875             | 1.770902  |

|                             |             |            |               |               |         |                                |             |            |               |               |
|-----------------------------|-------------|------------|---------------|---------------|---------|--------------------------------|-------------|------------|---------------|---------------|
| 3 Week                      | 5.088       | 1.17893    | 16.3125       | 2.387173      | 15.45   | 1.612452                       | 12.8375     | 2.173671   | 13            | 2.602883      |
| 4 Week                      | 5.14        | 0.84       | 20.9375       | 2.497467      | 16.2875 | 1.325177                       | 12.325      | 3.351026   | 12.325        | 2.201562      |
| 5 Week                      | 5.04        | 0.67       | 16.6          | 1.367479      | 16.45   | 4.015595                       | 11.8        | 3.348134   | 11.3625       | 2.897817      |
| 6 Week                      | 5.07        | 0.44       | 16.45         | 1.812457      | 14.025  | 0.736122                       | 10.9875     | 2.385601   | 9.3625        | 1.925446      |
| 7 Week                      | 5.28        | 0.56       | 18.1875       | 1.525973      | 12.775  | 2.112907                       | 10.8625     | 1.613178   | 9.2625        | 1.757795      |
| 8 Week                      | 4.77        | 0.402906   | 17.3125       | 1.946012      | 12.925  | 4.919794                       | 11.2125     | 4.253363   | 9.5125        | 3.250553      |
| <b>HOMA-IR index</b>        |             |            |               |               |         | <b>Serum TC (mmol/L)</b>       |             |            |               |               |
| <b>NC</b>                   | <b>T2DM</b> | <b>Met</b> | <b>FBTP-L</b> | <b>FBTP-H</b> |         | <b>NC</b>                      | <b>T2DM</b> | <b>Met</b> | <b>FBTP-L</b> | <b>FBTP-H</b> |
| 8.244995                    | 33.75175    | 42.82533   | 10.06106      | 6.786537      |         | 1.503811                       | 37.43037    | 3.084448   | 4.500436      | 2.45878       |
| 8.734234                    | 28.89765    | 16.15541   | 10.56081      | 10.11011      |         | 1.273302                       | 13.85254    | 3.183238   | 3.940627      | 3.446678      |
| 9.018018                    | 27.73123    | 23.61862   | 13.50425      | 7.953203      |         | 2.09655                        | 33.18241    | 2.2612     | 4.072346      | 3.545467      |
| 8.188939                    | 38.20696    | 30.11762   | 22.05706      | 12.30205      |         | 2.2612                         | 14.59923    | 3.775977   | 4.368716      | 2.16241       |
| 7.771772                    | 35.99174    | 21.88814   | 12.97347      | 20.6001       |         | 1.931901                       | 10.19731    | 3.314958   | 4.039416      | 4.829735      |
| 8.036036                    | 33.96446    | 8.841091   | 8.892643      | 12.83083      |         | 1.931901                       | 24.42305    | 4.236996   | 4.401646      | 5.159034      |
| 8.145333                    | 39.11643    | 28.49351   | 16.01069      | 9.805529      |         | 1.83654                        | 15.32645    | 3.32651    | 4.2635        | 3.6594        |
| 7.736619                    | 38.70569    | 19.67064   | 25.34349      | 13.05722      |         | 1.85634                        | 16.3264     | 3.32654    | 4.3654        | 3.6548        |
| <b>Serum TG (mmol/L)</b>    |             |            |               |               |         | <b>Serum LDL-C (mmol/L)</b>    |             |            |               |               |
| <b>NC</b>                   | <b>T2DM</b> | <b>Met</b> | <b>FBTP-L</b> | <b>FBTP-H</b> |         | <b>NC</b>                      | <b>T2DM</b> | <b>Met</b> | <b>FBTP-L</b> | <b>FBTP-H</b> |
| 1.246379                    | 4.069502    | 0.480532   | 1.096213      | 0.540598      |         | 0.263841                       | 4.586711    | 0.300373   | 0.543914      | 0.263841      |
| 0.916013                    | 2.066179    | 0.570631   | 0.870963      | 0.690764      |         | 0.300373                       | 2.469374    | 0.300373   | 0.51956       | 0.251664      |
| 0.825914                    | 1.786977    | 0.495548   | 0.991096      | 0.630698      |         | 0.361258                       | 2.091884    | 0.22731    | 0.434321      | 0.543914      |
| 2.387641                    | 4.835349    | 0.330365   | 0.495548      | 0.675748      |         | 0.190779                       | 2.643163    | 0.336904   | 0.568269      | 0.129893      |
| 0.946047                    | 2.718007    | 0.495548   | 1.246379      | 0.615681      |         | 0.653508                       | 4.72066     | 0.592623   | 0.531737      | 0.6048        |
| 1.411561                    | 5.484385    | 0.555615   | 1.336478      | 0.390432      |         | 0.117716                       | 6.39371     | 0.300373   | 0.580446      | 0.51956       |
| 1.2654                      | 3.85564     | 0.4658     | 1.00654       | 0.63254       |         | 0.31465                        | 6.2654      | 0.3654     | 0.55265       | 0.38654       |
| 1.2658                      | 3.86541     | 0.4658     | 1.0326        | 0.6254        |         | 0.3654                         | 6.3254      | 0.3654     | 0.5354        | 0.389564      |
| <b>Serum HDL-C (mmol/L)</b> |             |            |               |               |         | <b>CAT activity (U/mgprot)</b> |             |            |               |               |
| <b>NC</b>                   | <b>T2DM</b> | <b>Met</b> | <b>FBTP-L</b> | <b>FBTP-H</b> |         | <b>NC</b>                      | <b>T2DM</b> | <b>Met</b> | <b>FBTP-L</b> | <b>FBTP-H</b> |

|                                   |             |            |               |               |                                  |             |            |               |               |
|-----------------------------------|-------------|------------|---------------|---------------|----------------------------------|-------------|------------|---------------|---------------|
| 6.760818                          | 5.076043    | 5.336909   | 7.447768      | 7.62386       | 1.101542                         | 0.05055     | 0.268835   | 0.204884      | 0.301544      |
| 6.565168                          | 4.489093    | 5.304301   | 6.695601      | 7.162993      | 1.400601                         | 0.353121    | 0.22632    | 0.251275      | 1.035863      |
| 6.499951                          | 4.326051    | 5.206476   | 6.532559      | 7.065168      | 1.384954                         | 0.140324    | 0.391927   | 0.210494      | 0.208433      |
| 6.239084                          | 4.288226    | 5.206476   | 5.869518      | 6.576043      | 1.562064                         | 0.29125     | 0.365782   | 0.421077      | 0.328441      |
| 6.010826                          | 4.2598      | 4.521701   | 5.804301      | 5.956484      | 1.386932                         | 0.277474    | 0.201078   | 0.235337      | 0.276551      |
| 5.815176                          | 4.130401    | 4.293442   | 6.847784      | 4.847784      | 1.165                            | 0.2265      | 0.196546   | 0.2654        | 0.43654       |
| 6.3214                            | 4.4356      | 5.03264    | 5.963234      | 7.03256       | 1.16625                          | 0.2654      | 0.193254   | 0.3654        | 0.43654       |
| 6.3254                            | 4.5624      | 5.12356    | 5.9546        | 7.0154        | 1.1166                           | 0.226584    | 0.26548    | 0.4652        | 0.4654        |
| <b>GSH-Px activity (U/mgprot)</b> |             |            |               |               | <b>Acetic acid (mmol/g)</b>      |             |            |               |               |
| <b>NC</b>                         | <b>T2DM</b> | <b>Met</b> | <b>FBTP-L</b> | <b>FBTP-H</b> | <b>NC</b>                        | <b>T2DM</b> | <b>Met</b> | <b>FBTP-L</b> | <b>FBTP-H</b> |
| 0.329803                          | 0.19317     | 0.167569   | 0.113084      | 0.324243      | 14.326                           | 5.6235      | 9.548      | 10.265        | 13.6985       |
| 0.303354                          | 0.186109    | 0.19153    | 0.174751      | 0.418364      | 14.265                           | 6.3215      | 9.264      | 10.658        | 14.658        |
| 0.599088                          | 0.145957    | 0.153509   | 0.26334       | 0.152904      | 15.654                           | 5.3654      | 9.354      | 11.365        | 14.6354       |
| 0.516966                          | 0.125338    | 0.198196   | 0.253993      | 0.51928       | <b>Propionic acid (mmol/g)</b>   |             |            |               |               |
| 0.503221                          | 0.190992    | 0.191462   | 0.260955      | 0.137887      | <b>NC</b>                        | <b>T2DM</b> | <b>Met</b> | <b>FBTP-L</b> | <b>FBTP-H</b> |
| 0.522735                          | 0.190992    | 0.130123   | 0.130647      | 0.3265        | 6.3                              | 4.2366      | 5.625      | 5.75631       | 6.3254        |
| 0.46525                           | 0.176331    | 0.175623   | 0.2316        | 0.3654        | 6.364                            | 4.0325      | 5.0325     | 5.864         | 6.3125        |
| 0.465385                          | 0.176413    | 0.17632    | 0.2654        | 0.4126        | 6.02631                          | 4.362       | 5.215      | 5.92          | 6.254         |
| <b>Butyric acid (mmol/g)</b>      |             |            |               |               | <b>Succinate acid (ug/g)</b>     |             |            |               |               |
| <b>NC</b>                         | <b>T2DM</b> | <b>Met</b> | <b>FBTP-L</b> | <b>FBTP-H</b> | <b>NC</b>                        | <b>T2DM</b> | <b>Met</b> | <b>FBTP-L</b> | <b>FBTP-H</b> |
| 4.325                             | 3.265       | 3.6548     | 3.9654        | 4.035         | 100                              | 41.32       | 150.36     | 162.35        | 210.326       |
| 4.156                             | 3.652       | 3.654      | 3.8654        | 4.658         | 101.65                           | 53.625      | 160.325    | 170.654       | 190.365       |
| 4.652                             | 3.54        | 3.8445     | 3.8469        | 4.658         | 118.36                           | 45.658      | 148.36     | 169.365       | 200.3265      |
| <b>Firmicutes richness (%)</b>    |             |            |               |               | <b>Bacteroidota richness (%)</b> |             |            |               |               |
| <b>NC</b>                         | <b>T2DM</b> | <b>Met</b> | <b>FBTP-L</b> | <b>FBTP-H</b> | <b>NC</b>                        | <b>T2DM</b> | <b>Met</b> | <b>FBTP-L</b> | <b>FBTP-H</b> |
| 88.08984                          | 50.73987    | 50.89411   | 85.00988      | 79.82359      | 8.709693                         | 0.294018    | 28.77524   | 11.17752      | 10.48826      |
| 82.23358                          | 39.57199    | 66.5542    | 75.02771      | 76.72917      | 16.15655                         | 58.73138    | 37.27768   | 19.33292      | 15.07688      |
| 78.98973                          | 45.0764     | 67.2772    | 76.59421      | 58.62534      | 19.43414                         | 3.802959    | 29.2717    | 18.8461       | 35.55695      |

|                                      |             |            |               |               |  |                                    |             |            |               |               |
|--------------------------------------|-------------|------------|---------------|---------------|--|------------------------------------|-------------|------------|---------------|---------------|
| 85.89194                             | 67.93753    | 52.63412   | 72.90693      | 86.51371      |  | 5.918928                           | 20.23907    | 17.8821    | 23.44917      | 9.794187      |
| <i>Actinobacteriota</i> richness (%) |             |            |               |               |  | <i>Proteobacteria</i> richness (%) |             |            |               |               |
| <b>NC</b>                            | <b>T2DM</b> | <b>Met</b> | <b>FBTP-L</b> | <b>FBTP-H</b> |  | <b>NC</b>                          | <b>T2DM</b> | <b>Met</b> | <b>FBTP-L</b> | <b>FBTP-H</b> |
| 0.06748                              | 48.35398    | 1.412252   | 0.303658      | 1.166434      |  | 0.09158                            | 0.612137    | 0.665156   | 0.453078      | 0.08676       |
| 0.130139                             | 0.462718    | 0.327758   | 0.713356      | 7.013062      |  | 0.173519                           | 0.03374     | 0.906155   | 0.400058      | 0.935075      |
| 0.930255                             | 0.120499    | 2.872704   | 0.501277      | 1.696631      |  | 0.101219                           | 0.322938    | 0.289198   | 0.00964       | 3.330602      |
| 0.467537                             | 0           | 0          | 2.005109      | 0.255459      |  | 0.0482                             | 6.791343    | 0.636237   | 0.477177      | 1.595411      |
